# Supplementary material for: First hyperpolarizability of some nonconjugated donor–acceptor 3D molecules: noncentrosymmetric crystal through conformational flexibility
Source: Royal Society of Chemistry journal article supplement (doi:10.1039/b414311f), 2005-01-01

### Electronic Supplementary Information

#### First Hyperpolarizability of some Nonconjugated Donor–Acceptor 3D Molecules: Noncentrosymmetric Crystal through Conformational Flexibility.

*K. Srinivas, Sanyasi Sitha, V. Jayathirtha Rao\*, K. Bhanuprakash\*, K. Ravikumar,  
 S. Philip Anthony, T. P. Radhakrishnan\**

#### Optimized Geometric Parameters for the two most stable Conformations of Molecule 1-4 at HF/6-31G level.

| Molecule1- Conformation 1 (C <sub>3</sub> ) |                    |                     |                      |                         |    |    |    |  |
|---------------------------------------------|--------------------|---------------------|----------------------|-------------------------|----|----|----|--|
| ATOM<br>NUMBER<br>(I)                       | CHEMICAL<br>SYMBOL | BOND LENGTH         | BOND ANGLE           | TWIST ANGLE             | NA | NB | NC |  |
|                                             |                    | (ANGSTROMS)<br>NA:I | (DEGREES)<br>NB:NA:I | (DEGREES)<br>NC:NB:NA:I |    |    |    |  |
| 1                                           | N                  | 0.00000             | 0.00000              | 0.00000                 | 0  | 0  | 0  |  |
| 2                                           | C                  | 1.33387             | 0.00000              | 0.00000                 | 1  | 0  | 0  |  |
| 3                                           | N                  | 1.34749             | 124.29644            | 0.00000                 | 2  | 1  | 0  |  |
| 4                                           | C                  | 1.33387             | 115.70252            | -.45068                 | 3  | 2  | 1  |  |
| 5                                           | N                  | 1.34749             | 124.29647            | .44917                  | 4  | 3  | 2  |  |
| 6                                           | C                  | 1.33387             | 115.70250            | -.45068                 | 5  | 4  | 3  |  |
| 7                                           | N                  | 1.34021             | 118.98564            | 179.97813               | 2  | 1  | 3  |  |
| 8                                           | N                  | 1.34021             | 118.98559            | -179.57271              | 4  | 3  | 2  |  |
| 9                                           | N                  | 1.34021             | 118.98555            | -179.57271              | 6  | 5  | 4  |  |
| 10                                          | C                  | 1.45537             | 124.44809            | -1.85643                | 7  | 2  | 1  |  |
| 11                                          | C                  | 1.45537             | 124.44814            | -1.85643                | 8  | 4  | 3  |  |
| 12                                          | C                  | 1.45537             | 124.44811            | -1.85643                | 9  | 6  | 5  |  |
| 13                                          | H                  | 1.08026             | 108.10119            | 37.11307                | 10 | 7  | 2  |  |
| 14                                          | H                  | 1.08026             | 108.10110            | 37.11305                | 11 | 8  | 4  |  |
| 15                                          | H                  | 1.08026             | 108.10118            | 37.11308                | 12 | 9  | 6  |  |
| 16                                          | H                  | 1.08447             | 110.44171            | -79.41831               | 10 | 7  | 2  |  |
| 17                                          | H                  | 1.08447             | 110.44167            | -79.41823               | 11 | 8  | 4  |  |
| 18                                          | H                  | 1.08447             | 110.44167            | -79.41832               | 12 | 9  | 6  |  |
| 19                                          | C                  | 1.51278             | 110.81847            | 158.64397               | 10 | 7  | 2  |  |
| 20                                          | C                  | 1.51278             | 110.81848            | 158.64395               | 11 | 8  | 4  |  |
| 21                                          | C                  | 1.51278             | 110.81846            | 158.64398               | 12 | 9  | 6  |  |
| 22                                          | C                  | 1.38922             | 120.76376            | 121.41542               | 19 | 10 | 7  |  |
| 23                                          | C                  | 1.38922             | 120.76376            | 121.41543               | 20 | 11 | 8  |  |
| 24                                          | C                  | 1.38922             | 120.76377            | 121.41538               | 21 | 12 | 9  |  |
| 25                                          | C                  | 1.39419             | 120.49934            | -59.41036               | 19 | 10 | 7  |  |
| 26                                          | C                  | 1.39419             | 120.49937            | -59.41033               | 20 | 11 | 8  |  |
| 27                                          | C                  | 1.39419             | 120.49932            | -59.41035               | 21 | 12 | 9  |  |
| 28                                          | C                  | 1.38959             | 120.76324            | 179.04454               | 22 | 19 | 10 |  |
| 29                                          | C                  | 1.38959             | 120.76325            | 179.04455               | 23 | 20 | 11 |  |
| 30                                          | C                  | 1.38959             | 120.76324            | 179.04455               | 24 | 21 | 12 |  |
| 31                                          | C                  | 1.38526             | 120.65902            | -179.19716              | 25 | 19 | 10 |  |
| 32                                          | C                  | 1.38526             | 120.65902            | -179.19715              | 26 | 20 | 11 |  |
| 33                                          | C                  | 1.38526             | 120.65901            | -179.19719              | 27 | 21 | 12 |  |
| 34                                          | C                  | 1.38532             | 120.06592            | .18807                  | 28 | 22 | 19 |  |
| 35                                          | C                  | 1.38532             | 120.06591            | .18805                  | 29 | 23 | 20 |  |
| 36                                          | C                  | 1.38532             | 120.06593            | .18807                  | 30 | 24 | 21 |  |
| 37                                          | H                  | 1.07402             | 119.60596            | -1.05364                | 22 | 19 | 10 |  |
| 38                                          | H                  | 1.07402             | 119.60595            | -1.05369                | 23 | 20 | 11 |  |
| 39                                          | H                  | 1.07402             | 119.60591            | -1.05364                | 24 | 21 | 12 |  |
| 40                                          | H                  | 1.07373             | 119.42994            | .84691                  | 25 | 19 | 10 |  |
| 41                                          | H                  | 1.07373             | 119.42995            | .84691                  | 26 | 20 | 11 |  |
| 42                                          | H                  | 1.07373             | 119.42996            | .84692                  | 27 | 21 | 12 |  |
| 43                                          | H                  | 1.07318             | 119.79695            | 179.98623               | 28 | 22 | 19 |  |
| 44                                          | H                  | 1.07318             | 119.79697            | 179.98622               | 29 | 23 | 20 |  |
| 45                                          | H                  | 1.07318             | 119.79695            | 179.98621               | 30 | 24 | 21 |  |
| 46                                          | H                  | 1.07323             | 119.83617            | 179.93514               | 31 | 25 | 19 |  |
| 47                                          | H                  | 1.07323             | 119.83617            | 179.93513               | 32 | 26 | 20 |  |
| 48                                          | H                  | 1.07323             | 119.83616            | 179.93507               | 33 | 27 | 21 |  |
| 49                                          | H                  | 1.07305             | 120.22252            | 179.89427               | 34 | 28 | 22 |  |
| 50                                          | H                  | 1.07305             | 120.22251            | 179.89427               | 35 | 29 | 23 |  |
| 51                                          | H                  | 1.07305             | 120.22253            | 179.89427               | 36 | 30 | 24 |  |
| 52                                          | H                  | .99236              | 116.15501            | -177.19291              | 7  | 2  | 1  |  |
| 53                                          | H                  | .99236              | 116.15500            | -177.19291              | 8  | 4  | 3  |  |

| ATOM NUMBER (I)                                 | CHEMICAL SYMBOL | BOND LENGTH (ANGSTROMS)<br>NA:I | BOND ANGLE (DEGREES)<br>NB:NA:I | TWIST ANGLE (DEGREES)<br>NC:NB:NA:I | NA | NB | NC |
|-------------------------------------------------|-----------------|---------------------------------|---------------------------------|-------------------------------------|----|----|----|
| 54                                              | H               | .99236                          | 116.15493                       | -177.19291                          | 9  | 6  | 5  |
| <b>Molecule1-Conformation 2 (C<sub>1</sub>)</b> |                 |                                 |                                 |                                     |    |    |    |
| 1                                               | N               | 0.00000                         | 0.00000                         | 0.00000                             | 0  | 0  | 0  |
| 2                                               | C               | 1.33389                         | 0.00000                         | 0.00000                             | 1  | 0  | 0  |
| 3                                               | N               | 1.34751                         | 124.29663                       | 0.00000                             | 2  | 1  | 0  |
| 4                                               | C               | 1.33387                         | 115.70055                       | -.06411                             | 3  | 2  | 1  |
| 5                                               | N               | 1.34749                         | 124.29770                       | .63501                              | 4  | 3  | 2  |
| 6                                               | C               | 1.33388                         | 115.70224                       | -.69578                             | 5  | 4  | 3  |
| 7                                               | N               | 1.34018                         | 118.98646                       | 179.76673                           | 2  | 1  | 3  |
| 8                                               | N               | 1.34020                         | 118.98281                       | -179.41755                          | 4  | 3  | 2  |
| 9                                               | N               | 1.34020                         | 118.98791                       | -179.54410                          | 6  | 5  | 4  |
| 10                                              | C               | 1.45540                         | 124.46172                       | 1.72541                             | 7  | 2  | 1  |
| 11                                              | C               | 1.45540                         | 124.44507                       | -1.79846                            | 8  | 4  | 3  |
| 12                                              | C               | 1.45536                         | 124.46268                       | -1.78294                            | 9  | 6  | 5  |
| 13                                              | H               | 1.08025                         | 108.10756                       | -36.94749                           | 10 | 7  | 2  |
| 14                                              | H               | 1.08026                         | 108.11381                       | 37.24743                            | 11 | 8  | 4  |
| 15                                              | H               | 1.08025                         | 108.09661                       | 36.84375                            | 12 | 9  | 6  |
| 16                                              | H               | 1.08446                         | 110.43666                       | 79.58739                            | 10 | 7  | 2  |
| 17                                              | H               | 1.08446                         | 110.43901                       | -79.28642                           | 11 | 8  | 4  |
| 18                                              | H               | 1.08447                         | 110.43960                       | -79.68877                           | 12 | 9  | 6  |
| 19                                              | C               | 1.51278                         | 110.81552                       | -158.47865                          | 10 | 7  | 2  |
| 20                                              | C               | 1.51277                         | 110.80795                       | 158.77559                           | 11 | 8  | 4  |
| 21                                              | C               | 1.51280                         | 110.82464                       | 158.37718                           | 12 | 9  | 6  |
| 22                                              | C               | 1.39420                         | 120.49205                       | 59.57870                            | 19 | 10 | 7  |
| 23                                              | C               | 1.38922                         | 120.76888                       | 121.23225                           | 20 | 11 | 8  |
| 24                                              | C               | 1.38922                         | 120.76560                       | 121.39718                           | 21 | 12 | 9  |
| 25                                              | C               | 1.38922                         | 120.76926                       | -121.23596                          | 19 | 10 | 7  |
| 26                                              | C               | 1.39420                         | 120.49344                       | -59.58092                           | 20 | 11 | 8  |
| 27                                              | C               | 1.39420                         | 120.49659                       | -59.42867                           | 21 | 12 | 9  |
| 28                                              | C               | 1.38526                         | 120.65737                       | 179.20662                           | 22 | 19 | 10 |
| 29                                              | C               | 1.38959                         | 120.76266                       | 179.05998                           | 23 | 20 | 11 |
| 30                                              | C               | 1.38959                         | 120.76323                       | 179.04375                           | 24 | 21 | 12 |
| 31                                              | C               | 1.38959                         | 120.76274                       | -179.05723                          | 25 | 19 | 10 |
| 32                                              | C               | 1.38526                         | 120.65888                       | -179.21051                          | 26 | 20 | 11 |
| 33                                              | C               | 1.38526                         | 120.65780                       | -179.19516                          | 27 | 21 | 12 |
| 34                                              | C               | 1.38532                         | 120.06487                       | -.18490                             | 31 | 25 | 19 |
| 35                                              | C               | 1.38532                         | 120.06549                       | .18461                              | 29 | 23 | 20 |
| 36                                              | C               | 1.38532                         | 120.06544                       | .18762                              | 30 | 24 | 21 |
| 37                                              | H               | 1.07374                         | 119.43136                       | -.83199                             | 22 | 19 | 10 |
| 38                                              | H               | 1.07402                         | 119.60570                       | -1.03679                            | 23 | 20 | 11 |
| 39                                              | H               | 1.07402                         | 119.60607                       | -1.05424                            | 24 | 21 | 12 |
| 40                                              | H               | 1.07403                         | 119.60588                       | 1.03903                             | 25 | 19 | 10 |
| 41                                              | H               | 1.07373                         | 119.43075                       | .82827                              | 26 | 20 | 11 |
| 42                                              | H               | 1.07373                         | 119.43025                       | .84909                              | 27 | 21 | 12 |
| 43                                              | H               | 1.07323                         | 119.83537                       | -179.92755                          | 28 | 22 | 19 |
| 44                                              | H               | 1.07318                         | 119.79761                       | 179.98769                           | 29 | 23 | 20 |
| 45                                              | H               | 1.07318                         | 119.79725                       | 179.98558                           | 30 | 24 | 21 |
| 46                                              | H               | 1.07318                         | 119.79797                       | -179.98694                          | 31 | 25 | 19 |
| 47                                              | H               | 1.07323                         | 119.83621                       | 179.93118                           | 32 | 26 | 20 |
| 48                                              | H               | 1.07323                         | 119.83566                       | 179.93135                           | 33 | 27 | 21 |
| 49                                              | H               | 1.07305                         | 120.22165                       | -179.89994                          | 34 | 31 | 25 |
| 50                                              | H               | 1.07305                         | 120.22220                       | 179.89878                           | 35 | 29 | 23 |
| 51                                              | H               | 1.07305                         | 120.22202                       | 179.89619                           | 36 | 30 | 24 |
| 52                                              | H               | .99234                          | 116.16253                       | 177.45272                           | 7  | 2  | 1  |
| 53                                              | H               | .99235                          | 116.16036                       | -177.18822                          | 8  | 4  | 3  |
| 54                                              | H               | .99235                          | 116.15891                       | -177.45593                          | 9  | 6  | 5  |

| Molecule2-Conformation 1 (C <sub>3</sub> ) |                 |                                 |                                 |                                     |    |    |    |
|--------------------------------------------|-----------------|---------------------------------|---------------------------------|-------------------------------------|----|----|----|
| ATOM NUMBER (I)                            | CHEMICAL SYMBOL | BOND LENGTH (ANGSTROMS)<br>NA:I | BOND ANGLE (DEGREES)<br>NB:NA:I | TWIST ANGLE (DEGREES)<br>NC:NB:NA:I | NA | NB | NC |
| 1                                          | N               | 0.00000                         | 0.00000                         | 0.00000                             | 0  | 0  | 0  |
| 2                                          | C               | 1.33394                         | 0.00000                         | 0.00000                             | 1  | 0  | 0  |
| 3                                          | N               | 1.34769                         | 124.31000                       | 0.00000                             | 2  | 1  | 0  |
| 4                                          | C               | 1.33394                         | 115.68910                       | - .42471                            | 3  | 2  | 1  |
| 5                                          | N               | 1.34769                         | 124.30998                       | .42327                              | 4  | 3  | 2  |
| 6                                          | C               | 1.33394                         | 115.68916                       | - .42471                            | 5  | 4  | 3  |
| 7                                          | N               | 1.33990                         | 118.91955                       | 179.96308                           | 2  | 1  | 3  |
| 8                                          | N               | 1.33990                         | 118.91950                       | -179.61365                          | 4  | 3  | 2  |
| 9                                          | N               | 1.33990                         | 118.91958                       | -179.61365                          | 6  | 5  | 4  |
| 10                                         | C               | 1.45626                         | 124.36756                       | -1.67238                            | 7  | 2  | 1  |
| 11                                         | C               | 1.45626                         | 124.36759                       | -1.67238                            | 8  | 4  | 3  |
| 12                                         | C               | 1.45626                         | 124.36753                       | -1.67238                            | 9  | 6  | 5  |
| 13                                         | H               | 1.08047                         | 108.20857                       | 39.82300                            | 10 | 7  | 2  |
| 14                                         | H               | 1.08047                         | 108.20862                       | 39.82302                            | 11 | 8  | 4  |
| 15                                         | H               | 1.08047                         | 108.20857                       | 39.82305                            | 12 | 9  | 6  |
| 16                                         | H               | 1.08436                         | 110.37821                       | -76.69281                           | 10 | 7  | 2  |
| 17                                         | H               | 1.08436                         | 110.37823                       | -76.69287                           | 11 | 8  | 4  |
| 18                                         | H               | 1.08436                         | 110.37818                       | -76.69285                           | 12 | 9  | 6  |
| 19                                         | C               | 1.51174                         | 110.66246                       | 161.43088                           | 10 | 7  | 2  |
| 20                                         | C               | 1.51174                         | 110.66245                       | 161.43089                           | 11 | 8  | 4  |
| 21                                         | C               | 1.51174                         | 110.66242                       | 161.43089                           | 12 | 9  | 6  |
| 22                                         | C               | 1.38633                         | 121.15677                       | 117.95660                           | 19 | 10 | 7  |
| 23                                         | C               | 1.38633                         | 121.15680                       | 117.95654                           | 20 | 11 | 8  |
| 24                                         | C               | 1.38633                         | 121.15676                       | 117.95656                           | 21 | 12 | 9  |
| 25                                         | C               | 1.39501                         | 120.64479                       | -62.62270                           | 19 | 10 | 7  |
| 26                                         | C               | 1.39501                         | 120.64481                       | -62.62270                           | 20 | 11 | 8  |
| 27                                         | C               | 1.39501                         | 120.64480                       | -62.62269                           | 21 | 12 | 9  |
| 28                                         | C               | 1.39062                         | 120.93887                       | 179.31457                           | 22 | 19 | 10 |
| 29                                         | C               | 1.39062                         | 120.93889                       | 179.31457                           | 23 | 20 | 11 |
| 30                                         | C               | 1.39062                         | 120.93886                       | 179.31457                           | 24 | 21 | 12 |
| 31                                         | C               | 1.38255                         | 120.83702                       | -179.46528                          | 25 | 19 | 10 |
| 32                                         | C               | 1.38255                         | 120.83706                       | -179.46531                          | 26 | 20 | 11 |
| 33                                         | C               | 1.38255                         | 120.83704                       | -179.46528                          | 27 | 21 | 12 |
| 34                                         | C               | 1.38766                         | 120.98748                       | .17435                              | 28 | 22 | 19 |
| 35                                         | C               | 1.38766                         | 120.98748                       | .17442                              | 29 | 23 | 20 |
| 36                                         | C               | 1.38766                         | 120.98747                       | .17438                              | 30 | 24 | 21 |
| 37                                         | H               | 1.07421                         | 119.67454                       | - .73927                            | 22 | 19 | 10 |
| 38                                         | H               | 1.07421                         | 119.67455                       | - .73916                            | 23 | 20 | 11 |
| 39                                         | H               | 1.07421                         | 119.67455                       | - .73925                            | 24 | 21 | 12 |
| 40                                         | H               | 1.07405                         | 119.43298                       | .57136                              | 25 | 19 | 10 |
| 41                                         | H               | 1.07405                         | 119.43296                       | .57137                              | 26 | 20 | 11 |
| 42                                         | H               | 1.07405                         | 119.43294                       | .57129                              | 27 | 21 | 12 |
| 43                                         | H               | 1.07397                         | 119.35504                       | -179.98633                          | 28 | 22 | 19 |
| 44                                         | H               | 1.07397                         | 119.35505                       | -179.98626                          | 29 | 23 | 20 |
| 45                                         | H               | 1.07397                         | 119.35504                       | -179.98624                          | 30 | 24 | 21 |
| 46                                         | H               | 1.07461                         | 119.46701                       | 179.92566                           | 31 | 25 | 19 |
| 47                                         | H               | 1.07461                         | 119.46696                       | 179.92564                           | 32 | 26 | 20 |
| 48                                         | H               | 1.07461                         | 119.46696                       | 179.92563                           | 33 | 27 | 21 |
| 49                                         | C               | 1.50982                         | 121.46831                       | 179.92917                           | 34 | 28 | 22 |
| 50                                         | C               | 1.50982                         | 121.46832                       | 179.92916                           | 35 | 29 | 23 |
| 51                                         | C               | 1.50982                         | 121.46829                       | 179.92919                           | 36 | 30 | 24 |
| 52                                         | H               | .99221                          | 116.25107                       | -177.30211                          | 7  | 2  | 1  |
| 53                                         | H               | .99222                          | 116.25099                       | -177.30211                          | 8  | 4  | 3  |
| 54                                         | H               | .99221                          | 116.25103                       | -177.30211                          | 9  | 6  | 5  |
| 55                                         | H               | 1.08256                         | 111.28452                       | .05910                              | 49 | 34 | 28 |
| 56                                         | H               | 1.08498                         | 111.18712                       | 120.20191                           | 49 | 34 | 28 |
| 57                                         | H               | 1.08499                         | 111.20426                       | -120.09945                          | 49 | 34 | 28 |
| 58                                         | H               | 1.08256                         | 111.28453                       | .05910                              | 50 | 35 | 29 |
| 59                                         | H               | 1.08498                         | 111.18710                       | 120.20191                           | 50 | 35 | 29 |
| 60                                         | H               | 1.08499                         | 111.20424                       | -120.09948                          | 50 | 35 | 29 |
| 61                                         | H               | 1.08256                         | 111.28454                       | .05905                              | 51 | 36 | 30 |
| 62                                         | H               | 1.08498                         | 111.18718                       | 120.20191                           | 51 | 36 | 30 |
| 63                                         | H               | 1.08499                         | 111.20426                       | -120.09948                          | 51 | 36 | 30 |

| Molecule2-Conformation 2 (C <sub>1</sub> ) |                 |                                 |                                 |                                     |    |    |    |
|--------------------------------------------|-----------------|---------------------------------|---------------------------------|-------------------------------------|----|----|----|
| ATOM NUMBER (I)                            | CHEMICAL SYMBOL | BOND LENGTH (ANGSTROMS)<br>NA:I | BOND ANGLE (DEGREES)<br>NB:NA:I | TWIST ANGLE (DEGREES)<br>NC:NB:NA:I | NA | NB | NC |
| 1                                          | N               | 0.00000                         | 0.00000                         | 0.00000                             | 0  | 0  | 0  |
| 2                                          | C               | 1.33395                         | 0.00000                         | 0.00000                             | 1  | 0  | 0  |
| 3                                          | N               | 1.34772                         | 124.31131                       | 0.00000                             | 2  | 1  | 0  |
| 4                                          | C               | 1.33393                         | 115.68742                       | -0.05563                            | 3  | 2  | 1  |
| 5                                          | N               | 1.34770                         | 124.31036                       | .59802                              | 4  | 3  | 2  |
| 6                                          | C               | 1.33394                         | 115.68910                       | -.65895                             | 5  | 4  | 3  |
| 7                                          | N               | 1.33985                         | 118.91583                       | 179.79722                           | 2  | 1  | 3  |
| 8                                          | N               | 1.33990                         | 118.92045                       | -179.46518                          | 4  | 3  | 2  |
| 9                                          | N               | 1.33987                         | 118.91603                       | -179.58389                          | 6  | 5  | 4  |
| 10                                         | C               | 1.45632                         | 124.37009                       | 1.52611                             | 7  | 2  | 1  |
| 11                                         | C               | 1.45628                         | 124.36918                       | -1.62052                            | 8  | 4  | 3  |
| 12                                         | C               | 1.45630                         | 124.36949                       | -1.58060                            | 9  | 6  | 5  |
| 13                                         | H               | 1.08048                         | 108.22465                       | -39.84856                           | 10 | 7  | 2  |
| 14                                         | H               | 1.08046                         | 108.21493                       | 39.85007                            | 11 | 8  | 4  |
| 15                                         | H               | 1.08048                         | 108.21554                       | 39.79738                            | 12 | 9  | 6  |
| 16                                         | H               | 1.08432                         | 110.36856                       | 76.67041                            | 10 | 7  | 2  |
| 17                                         | H               | 1.08435                         | 110.37557                       | -76.66556                           | 11 | 8  | 4  |
| 18                                         | H               | 1.08433                         | 110.37207                       | -76.71984                           | 12 | 9  | 6  |
| 19                                         | C               | 1.51170                         | 110.65350                       | -161.45664                          | 10 | 7  | 2  |
| 20                                         | C               | 1.51171                         | 110.65917                       | 161.45675                           | 11 | 8  | 4  |
| 21                                         | C               | 1.51171                         | 110.65838                       | 161.40838                           | 12 | 9  | 6  |
| 22                                         | C               | 1.39502                         | 120.63639                       | 62.87562                            | 19 | 10 | 7  |
| 23                                         | C               | 1.38633                         | 121.15957                       | 117.85707                           | 20 | 11 | 8  |
| 24                                         | C               | 1.38634                         | 121.16136                       | 117.78410                           | 21 | 12 | 9  |
| 25                                         | C               | 1.38633                         | 121.16439                       | -117.67942                          | 19 | 10 | 7  |
| 26                                         | C               | 1.39501                         | 120.64222                       | -62.70905                           | 20 | 11 | 8  |
| 27                                         | C               | 1.39501                         | 120.64016                       | -62.77618                           | 21 | 12 | 9  |
| 28                                         | C               | 1.38255                         | 120.83634                       | 179.48846                           | 22 | 19 | 10 |
| 29                                         | C               | 1.39062                         | 120.93936                       | 179.32874                           | 23 | 20 | 11 |
| 30                                         | C               | 1.39062                         | 120.93894                       | 179.33393                           | 24 | 21 | 12 |
| 31                                         | C               | 1.39062                         | 120.93865                       | -179.34050                          | 25 | 19 | 10 |
| 32                                         | C               | 1.38255                         | 120.83689                       | -179.47513                          | 26 | 20 | 11 |
| 33                                         | C               | 1.38255                         | 120.83678                       | -179.48103                          | 27 | 21 | 12 |
| 34                                         | C               | 1.38766                         | 120.98656                       | -.16550                             | 31 | 25 | 19 |
| 35                                         | C               | 1.38765                         | 120.98674                       | .16443                              | 29 | 23 | 20 |
| 36                                         | C               | 1.38766                         | 120.98703                       | .16512                              | 30 | 24 | 21 |
| 37                                         | H               | 1.07406                         | 119.43447                       | -.54627                             | 22 | 19 | 10 |
| 38                                         | H               | 1.07421                         | 119.67387                       | -.73141                             | 23 | 20 | 11 |
| 39                                         | H               | 1.07421                         | 119.67376                       | -.72545                             | 24 | 21 | 12 |
| 40                                         | H               | 1.07421                         | 119.67389                       | .71580                              | 25 | 19 | 10 |
| 41                                         | H               | 1.07405                         | 119.43372                       | .56035                              | 26 | 20 | 11 |
| 42                                         | H               | 1.07406                         | 119.43369                       | .55698                              | 27 | 21 | 12 |
| 43                                         | H               | 1.07461                         | 119.46636                       | -179.92456                          | 28 | 22 | 19 |
| 44                                         | H               | 1.07397                         | 119.35589                       | -179.99132                          | 29 | 23 | 20 |
| 45                                         | H               | 1.07397                         | 119.35556                       | -179.99121                          | 30 | 24 | 21 |
| 46                                         | H               | 1.07397                         | 119.35612                       | 179.98955                           | 31 | 25 | 19 |
| 47                                         | H               | 1.07461                         | 119.46625                       | 179.92730                           | 32 | 26 | 20 |
| 48                                         | H               | 1.07461                         | 119.46660                       | 179.92751                           | 33 | 27 | 21 |
| 49                                         | C               | 1.50983                         | 121.46771                       | -179.96879                          | 34 | 31 | 25 |
| 50                                         | C               | 1.50982                         | 121.46839                       | 179.97432                           | 35 | 29 | 23 |
| 51                                         | C               | 1.50983                         | 121.46773                       | 179.97233                           | 36 | 30 | 24 |
| 52                                         | H               | .99219                          | 116.26510                       | 177.55814                           | 7  | 2  | 1  |
| 53                                         | H               | .99221                          | 116.25294                       | -177.30035                          | 8  | 4  | 3  |
| 54                                         | H               | .99220                          | 116.26261                       | -177.55926                          | 9  | 6  | 5  |
| 55                                         | H               | 1.08501                         | 111.18247                       | -119.70880                          | 49 | 34 | 31 |
| 56                                         | H               | 1.08256                         | 111.28457                       | .42641                              | 49 | 34 | 31 |
| 57                                         | H               | 1.08496                         | 111.20830                       | 120.59275                           | 49 | 34 | 31 |
| 58                                         | H               | 1.08256                         | 111.28487                       | -.56150                             | 50 | 35 | 29 |
| 59                                         | H               | 1.08501                         | 111.18193                       | 119.57236                           | 50 | 35 | 29 |
| 60                                         | H               | 1.08495                         | 111.20860                       | -120.72968                          | 50 | 35 | 29 |
| 61                                         | H               | 1.08256                         | 111.28463                       | -.53622                             | 51 | 36 | 30 |
| 62                                         | H               | 1.08501                         | 111.18254                       | 119.59795                           | 51 | 36 | 30 |

63 H 1.08495 111.20859 -120.70333 51 36 30

**Molecule3-Conformation 1 (C<sub>3</sub>)**

| ATOM<br>NUMBER<br>(I) | CHEMICAL<br>SYMBOL | BOND LENGTH         | BOND ANGLE           | TWIST ANGLE             | NA | NB | NC |
|-----------------------|--------------------|---------------------|----------------------|-------------------------|----|----|----|
|                       |                    | (ANGSTROMS)<br>NA:I | (DEGREES)<br>NB:NA:I | (DEGREES)<br>NC:NB:NA:I |    |    |    |
| 1                     | N                  | 0.00000             | 0.00000              | 0.00000                 | 0  | 0  | 0  |
| 2                     | C                  | 1.33396             | 0.00000              | 0.00000                 | 1  | 0  | 0  |
| 3                     | N                  | 1.34774             | 124.32111            | 0.00000                 | 2  | 1  | 0  |
| 4                     | C                  | 1.33396             | 115.67789            | - .45260                | 3  | 2  | 1  |
| 5                     | N                  | 1.34774             | 124.32108            | .45106                  | 4  | 3  | 2  |
| 6                     | C                  | 1.33396             | 115.67788            | - .45260                | 5  | 4  | 3  |
| 7                     | N                  | 1.33975             | 118.85916            | 179.94511               | 2  | 1  | 3  |
| 8                     | N                  | 1.33975             | 118.85917            | -179.60383              | 4  | 3  | 2  |
| 9                     | N                  | 1.33975             | 118.85916            | -179.60383              | 6  | 5  | 4  |
| 10                    | C                  | 1.45698             | 124.28638            | -1.39735                | 7  | 2  | 1  |
| 11                    | C                  | 1.45698             | 124.28640            | -1.39735                | 8  | 4  | 3  |
| 12                    | C                  | 1.45698             | 124.28641            | -1.39735                | 9  | 6  | 5  |
| 13                    | H                  | 1.08055             | 108.28784            | 41.65832                | 10 | 7  | 2  |
| 14                    | H                  | 1.08055             | 108.28780            | 41.65831                | 11 | 8  | 4  |
| 15                    | H                  | 1.08055             | 108.28778            | 41.65831                | 12 | 9  | 6  |
| 16                    | H                  | 1.08428             | 110.30513            | -74.79957               | 10 | 7  | 2  |
| 17                    | H                  | 1.08428             | 110.30508            | -74.79960               | 11 | 8  | 4  |
| 18                    | H                  | 1.08428             | 110.30511            | -74.79957               | 12 | 9  | 6  |
| 19                    | C                  | 1.51073             | 110.57841            | 163.35783               | 10 | 7  | 2  |
| 20                    | C                  | 1.51073             | 110.57838            | 163.35783               | 11 | 8  | 4  |
| 21                    | C                  | 1.51073             | 110.57839            | 163.35783               | 12 | 9  | 6  |
| 22                    | C                  | 1.38386             | 121.31268            | 114.48093               | 19 | 10 | 7  |
| 23                    | C                  | 1.38386             | 121.31265            | 114.48095               | 20 | 11 | 8  |
| 24                    | C                  | 1.38386             | 121.31263            | 114.48098               | 21 | 12 | 9  |
| 25                    | C                  | 1.39861             | 120.59408            | -65.87181               | 19 | 10 | 7  |
| 26                    | C                  | 1.39861             | 120.59409            | -65.87182               | 20 | 11 | 8  |
| 27                    | C                  | 1.39861             | 120.59409            | -65.87186               | 21 | 12 | 9  |
| 28                    | C                  | 1.39328             | 121.50013            | 179.54765               | 22 | 19 | 10 |
| 29                    | C                  | 1.39328             | 121.50012            | 179.54763               | 23 | 20 | 11 |
| 30                    | C                  | 1.39328             | 121.50011            | 179.54759               | 24 | 21 | 12 |
| 31                    | C                  | 1.37825             | 121.13633            | -179.69027              | 25 | 19 | 10 |
| 32                    | C                  | 1.37825             | 121.13632            | -179.69026              | 26 | 20 | 11 |
| 33                    | C                  | 1.37825             | 121.13633            | -179.69026              | 27 | 21 | 12 |
| 34                    | C                  | 1.38306             | 119.38590            | .15490                  | 28 | 22 | 19 |
| 35                    | C                  | 1.38306             | 119.38589            | .15493                  | 29 | 23 | 20 |
| 36                    | C                  | 1.38306             | 119.38585            | .15492                  | 30 | 24 | 21 |
| 37                    | H                  | 1.07398             | 119.64936            | - .45110                | 22 | 19 | 10 |
| 38                    | H                  | 1.07398             | 119.64943            | - .45113                | 23 | 20 | 11 |
| 39                    | H                  | 1.07398             | 119.64946            | - .45115                | 24 | 21 | 12 |
| 40                    | H                  | 1.07372             | 119.40445            | .32639                  | 25 | 19 | 10 |
| 41                    | H                  | 1.07372             | 119.40445            | .32638                  | 26 | 20 | 11 |
| 42                    | H                  | 1.07372             | 119.40443            | .32647                  | 27 | 21 | 12 |
| 43                    | H                  | 1.07088             | 119.40887            | -179.94874              | 28 | 22 | 19 |
| 44                    | H                  | 1.07088             | 119.40887            | -179.94876              | 29 | 23 | 20 |
| 45                    | H                  | 1.07088             | 119.40884            | -179.94876              | 30 | 24 | 21 |
| 46                    | H                  | 1.07107             | 121.63339            | 179.88786               | 31 | 25 | 19 |
| 47                    | H                  | 1.07107             | 121.63334            | 179.88788               | 32 | 26 | 20 |
| 48                    | H                  | 1.07106             | 121.63337            | 179.88786               | 33 | 27 | 21 |
| 49                    | O                  | 1.37277             | 124.18278            | 179.94097               | 34 | 28 | 22 |
| 50                    | O                  | 1.37277             | 124.18279            | 179.94099               | 35 | 29 | 23 |
| 51                    | O                  | 1.37277             | 124.18275            | 179.94098               | 36 | 30 | 24 |
| 52                    | H                  | .99214              | 116.33005            | -177.50303              | 7  | 2  | 1  |
| 53                    | H                  | .99214              | 116.33002            | -177.50303              | 8  | 4  | 3  |
| 54                    | H                  | .99214              | 116.33007            | -177.50303              | 9  | 6  | 5  |
| 55                    | C                  | 1.42786             | 121.58803            | .26880                  | 49 | 34 | 28 |
| 56                    | C                  | 1.42786             | 121.58802            | .26877                  | 50 | 35 | 29 |
| 57                    | C                  | 1.42786             | 121.58804            | .26876                  | 51 | 36 | 30 |
| 58                    | H                  | 1.08241             | 111.08697            | -61.38303               | 55 | 49 | 34 |
| 59                    | H                  | 1.08240             | 111.08264            | 61.02695                | 55 | 49 | 34 |
| 60                    | H                  | 1.07616             | 105.58118            | 179.82623               | 55 | 49 | 34 |
| 61                    | H                  | 1.08241             | 111.08697            | -61.38304               | 56 | 50 | 35 |
| 62                    | H                  | 1.08240             | 111.08271            | 61.02697                | 56 | 50 | 35 |

|    |   |         |           |           |    |    |    |
|----|---|---------|-----------|-----------|----|----|----|
| 63 | H | 1.07616 | 105.58119 | 179.82625 | 56 | 50 | 35 |
| 64 | H | 1.08241 | 111.08696 | -61.38304 | 57 | 51 | 36 |
| 65 | H | 1.08240 | 111.08263 | 61.02695  | 57 | 51 | 36 |
| 66 | H | 1.07616 | 105.58115 | 179.82628 | 57 | 51 | 36 |

**Molecule3-Conformation 2 (C<sub>1</sub>)**

| ATOM<br>NUMBER<br>(I) | CHEMICAL<br>SYMBOL | BOND LENGTH         | BOND ANGLE           | TWIST ANGLE             | NA | NB | NC |
|-----------------------|--------------------|---------------------|----------------------|-------------------------|----|----|----|
|                       |                    | (ANGSTROMS)<br>NA:I | (DEGREES)<br>NB:NA:I | (DEGREES)<br>NC:NB:NA:I |    |    |    |
| 1                     | N                  | 0.00000             | 0.00000              | 0.00000                 | 0  | 0  | 0  |
| 2                     | C                  | 1.33526             | 0.00000              | 0.00000                 | 1  | 0  | 0  |
| 3                     | N                  | 1.34732             | 124.10327            | 0.00000                 | 2  | 1  | 0  |
| 4                     | C                  | 1.33439             | 115.82420            | -.60267                 | 3  | 2  | 1  |
| 5                     | N                  | 1.34757             | 124.31371            | .30330                  | 4  | 3  | 2  |
| 6                     | C                  | 1.33397             | 115.62780            | -.23049                 | 5  | 4  | 3  |
| 7                     | N                  | 1.34098             | 119.51127            | 179.79806               | 2  | 1  | 3  |
| 8                     | N                  | 1.33907             | 118.82011            | -179.70544              | 4  | 3  | 2  |
| 9                     | N                  | 1.33966             | 118.81079            | -179.65201              | 6  | 5  | 4  |
| 10                    | C                  | 1.45570             | 125.54099            | .29735                  | 7  | 2  | 1  |
| 11                    | C                  | 1.45735             | 124.29142            | -1.32795                | 8  | 4  | 3  |
| 12                    | C                  | 1.45738             | 124.27136            | -1.16556                | 9  | 6  | 5  |
| 13                    | H                  | 1.07803             | 107.22785            | 15.63310                | 10 | 7  | 2  |
| 14                    | H                  | 1.08058             | 108.31141            | 42.20605                | 11 | 8  | 4  |
| 15                    | H                  | 1.08056             | 108.31405            | 41.84728                | 12 | 9  | 6  |
| 16                    | H                  | 1.08362             | 108.27623            | 131.53671               | 10 | 7  | 2  |
| 17                    | H                  | 1.08414             | 110.26792            | -74.25650               | 11 | 8  | 4  |
| 18                    | H                  | 1.08418             | 110.27436            | -74.61384               | 12 | 9  | 6  |
| 19                    | C                  | 1.51464             | 113.45328            | -106.74758              | 10 | 7  | 2  |
| 20                    | C                  | 1.51064             | 110.55274            | 163.90198               | 11 | 8  | 4  |
| 21                    | C                  | 1.51066             | 110.55003            | 163.55297               | 12 | 9  | 6  |
| 22                    | C                  | 1.38906             | 120.76019            | 68.09722                | 19 | 10 | 7  |
| 23                    | C                  | 1.38389             | 121.30984            | 114.06312               | 20 | 11 | 8  |
| 24                    | C                  | 1.38388             | 121.31849            | 114.08108               | 21 | 12 | 9  |
| 25                    | C                  | 1.39260             | 121.12343            | -111.87566              | 19 | 10 | 7  |
| 26                    | C                  | 1.39860             | 120.59196            | -66.26779               | 20 | 11 | 8  |
| 27                    | C                  | 1.39862             | 120.58577            | -66.25133               | 21 | 12 | 9  |
| 28                    | C                  | 1.38830             | 121.31603            | -179.81708              | 22 | 19 | 10 |
| 29                    | C                  | 1.39323             | 121.49554            | 179.57705               | 23 | 20 | 11 |
| 30                    | C                  | 1.39324             | 121.49847            | 179.58073               | 24 | 21 | 12 |
| 31                    | C                  | 1.38340             | 121.27975            | 179.89323               | 25 | 19 | 10 |
| 32                    | C                  | 1.37825             | 121.13495            | -179.72164              | 26 | 20 | 11 |
| 33                    | C                  | 1.37823             | 121.13507            | -179.72492              | 27 | 21 | 12 |
| 34                    | C                  | 1.38727             | 119.74902            | -.05934                 | 31 | 25 | 19 |
| 35                    | C                  | 1.38311             | 119.38795            | .15279                  | 29 | 23 | 20 |
| 36                    | C                  | 1.38311             | 119.38684            | .15112                  | 30 | 24 | 21 |
| 37                    | H                  | 1.07347             | 119.34775            | .36037                  | 22 | 19 | 10 |
| 38                    | H                  | 1.07397             | 119.65208            | -.41261                 | 23 | 20 | 11 |
| 39                    | H                  | 1.07399             | 119.65206            | -.39941                 | 24 | 21 | 12 |
| 40                    | H                  | 1.07447             | 119.65355            | -.20077                 | 25 | 19 | 10 |
| 41                    | H                  | 1.07375             | 119.41254            | .28282                  | 26 | 20 | 11 |
| 42                    | H                  | 1.07375             | 119.41356            | .27230                  | 27 | 21 | 12 |
| 43                    | H                  | 1.07105             | 119.40165            | -179.93234              | 28 | 22 | 19 |
| 44                    | H                  | 1.07087             | 119.40831            | -179.94052              | 29 | 23 | 20 |
| 45                    | H                  | 1.07087             | 119.41190            | -179.93881              | 30 | 24 | 21 |
| 46                    | H                  | 1.07113             | 121.59688            | -179.99716              | 31 | 25 | 19 |
| 47                    | H                  | 1.07106             | 121.63564            | 179.88637               | 32 | 26 | 20 |
| 48                    | H                  | 1.07105             | 121.63456            | 179.88472               | 33 | 27 | 21 |
| 49                    | O                  | 1.37457             | 116.02293            | -179.94475              | 34 | 31 | 25 |
| 50                    | O                  | 1.37262             | 124.18423            | 179.94443               | 35 | 29 | 23 |
| 51                    | O                  | 1.37256             | 124.18638            | 179.94188               | 36 | 30 | 24 |
| 52                    | H                  | .99265              | 115.36252            | -176.95523              | 7  | 2  | 1  |
| 53                    | H                  | .99216              | 116.34957            | -177.62961              | 8  | 4  | 3  |
| 54                    | H                  | .99209              | 116.41372            | -177.99954              | 9  | 6  | 5  |
| 55                    | C                  | 1.42736             | 121.57616            | 179.89014               | 49 | 34 | 31 |
| 56                    | C                  | 1.42796             | 121.59748            | .28530                  | 50 | 35 | 29 |
| 57                    | C                  | 1.42796             | 121.60362            | .28987                  | 51 | 36 | 30 |
| 58                    | H                  | 1.08247             | 111.13143            | -61.04357               | 55 | 49 | 34 |
| 59                    | H                  | 1.08247             | 111.13334            | 61.38014                | 55 | 49 | 34 |
| 60                    | H                  | 1.07632             | 105.59022            | -179.83742              | 55 | 49 | 34 |
| 61                    | H                  | 1.08240             | 111.08363            | -61.39025               | 56 | 50 | 35 |

|    |   |         |           |           |    |    |    |
|----|---|---------|-----------|-----------|----|----|----|
| 62 | H | 1.08239 | 111.07919 | 61.02146  | 56 | 50 | 35 |
| 63 | H | 1.07615 | 105.57791 | 179.81984 | 56 | 50 | 35 |
| 64 | H | 1.08240 | 111.08290 | -61.39959 | 57 | 51 | 36 |
| 65 | H | 1.08239 | 111.07852 | 61.01443  | 57 | 51 | 36 |
| 66 | H | 1.07614 | 105.57706 | 179.81287 | 57 | 51 | 36 |

**Molecule4-Conformation 1 (C<sub>3</sub>)**

| ATOM NUMBER (I) | CHEMICAL SYMBOL | BOND LENGTH (ANGSTROMS)<br>NA:I | BOND ANGLE (DEGREES)<br>NB:NA:I | TWIST ANGLE (DEGREES)<br>NC:NB:NA:I | NA | NB | NC |
|-----------------|-----------------|---------------------------------|---------------------------------|-------------------------------------|----|----|----|
| 1               | N               | 0.00000                         | 0.00000                         | 0.00000                             | 0  | 0  | 0  |
| 2               | C               | 1.33386                         | 0.00000                         | 0.00000                             | 1  | 0  | 0  |
| 3               | N               | 1.34688                         | 124.24937                       | 0.00000                             | 2  | 1  | 0  |
| 4               | C               | 1.33386                         | 115.74972                       | - .41446                            | 3  | 2  | 1  |
| 5               | N               | 1.34688                         | 124.24940                       | .41312                              | 4  | 3  | 2  |
| 6               | C               | 1.33386                         | 115.74980                       | - .41446                            | 5  | 4  | 3  |
| 7               | N               | 1.34117                         | 119.17156                       | -179.93592                          | 2  | 1  | 3  |
| 8               | N               | 1.34117                         | 119.17149                       | -179.52280                          | 4  | 3  | 2  |
| 9               | N               | 1.34117                         | 119.17155                       | -179.52280                          | 6  | 5  | 4  |
| 10              | C               | 1.45422                         | 124.75684                       | -2.46599                            | 7  | 2  | 1  |
| 11              | C               | 1.45422                         | 124.75689                       | -2.46599                            | 8  | 4  | 3  |
| 12              | C               | 1.45422                         | 124.75686                       | -2.46599                            | 9  | 6  | 5  |
| 13              | H               | 1.07950                         | 107.73617                       | 28.95963                            | 10 | 7  | 2  |
| 14              | H               | 1.07950                         | 107.73610                       | 28.95959                            | 11 | 8  | 4  |
| 15              | H               | 1.07950                         | 107.73616                       | 28.95961                            | 12 | 9  | 6  |
| 16              | H               | 1.08487                         | 110.47379                       | -87.49326                           | 10 | 7  | 2  |
| 17              | H               | 1.08487                         | 110.47373                       | -87.49324                           | 11 | 8  | 4  |
| 18              | H               | 1.08487                         | 110.47373                       | -87.49326                           | 12 | 9  | 6  |
| 19              | C               | 1.51315                         | 111.18934                       | 150.56469                           | 10 | 7  | 2  |
| 20              | C               | 1.51315                         | 111.18937                       | 150.56466                           | 11 | 8  | 4  |
| 21              | C               | 1.51315                         | 111.18930                       | 150.56471                           | 12 | 9  | 6  |
| 22              | C               | 1.38962                         | 120.70978                       | 124.81514                           | 19 | 10 | 7  |
| 23              | C               | 1.38962                         | 120.70977                       | 124.81513                           | 20 | 11 | 8  |
| 24              | C               | 1.38962                         | 120.70975                       | 124.81519                           | 21 | 12 | 9  |
| 25              | C               | 1.39475                         | 120.55224                       | -56.27836                           | 19 | 10 | 7  |
| 26              | C               | 1.39475                         | 120.55227                       | -56.27833                           | 20 | 11 | 8  |
| 27              | C               | 1.39475                         | 120.55227                       | -56.27842                           | 21 | 12 | 9  |
| 28              | C               | 1.38931                         | 121.08625                       | 178.72740                           | 22 | 19 | 10 |
| 29              | C               | 1.38930                         | 121.08626                       | 178.72739                           | 23 | 20 | 11 |
| 30              | C               | 1.38931                         | 121.08625                       | 178.72734                           | 24 | 21 | 12 |
| 31              | C               | 1.38466                         | 120.96398                       | -178.87379                          | 25 | 19 | 10 |
| 32              | C               | 1.38466                         | 120.96400                       | -178.87381                          | 26 | 20 | 11 |
| 33              | C               | 1.38466                         | 120.96400                       | -178.87375                          | 27 | 21 | 12 |
| 34              | C               | 1.37425                         | 118.26317                       | .19226                              | 28 | 22 | 19 |
| 35              | C               | 1.37425                         | 118.26317                       | .19230                              | 29 | 23 | 20 |
| 36              | C               | 1.37425                         | 118.26316                       | .19224                              | 30 | 24 | 21 |
| 37              | H               | 1.07321                         | 119.74624                       | -1.37116                            | 22 | 19 | 10 |
| 38              | H               | 1.07321                         | 119.74626                       | -1.37109                            | 23 | 20 | 11 |
| 39              | H               | 1.07321                         | 119.74628                       | -1.37125                            | 24 | 21 | 12 |
| 40              | H               | 1.07271                         | 119.51702                       | 1.26381                             | 25 | 19 | 10 |
| 41              | H               | 1.07271                         | 119.51700                       | 1.26387                             | 26 | 20 | 11 |
| 42              | H               | 1.07271                         | 119.51699                       | 1.26391                             | 27 | 21 | 12 |
| 43              | H               | 1.07068                         | 121.71926                       | 179.95234                           | 28 | 22 | 19 |
| 44              | H               | 1.07068                         | 121.71927                       | 179.95239                           | 29 | 23 | 20 |
| 45              | H               | 1.07068                         | 121.71929                       | 179.95229                           | 30 | 24 | 21 |
| 46              | H               | 1.07077                         | 121.76045                       | 179.93555                           | 31 | 25 | 19 |
| 47              | H               | 1.07077                         | 121.76048                       | 179.93549                           | 32 | 26 | 20 |
| 48              | H               | 1.07077                         | 121.76046                       | 179.93556                           | 33 | 27 | 21 |
| 49              | F               | 1.37503                         | 118.80503                       | 179.82939                           | 34 | 28 | 22 |
| 50              | F               | 1.37503                         | 118.80503                       | 179.82934                           | 35 | 29 | 23 |
| 51              | F               | 1.37503                         | 118.80505                       | 179.82934                           | 36 | 30 | 24 |
| 52              | H               | .99277                          | 115.88710                       | -177.02362                          | 7  | 2  | 1  |
| 53              | H               | .99277                          | 115.88711                       | -177.02362                          | 8  | 4  | 3  |
| 54              | H               | .99277                          | 115.88708                       | -177.02362                          | 9  | 6  | 5  |

| Molecule4-Conformation 2 (C <sub>1</sub> ) |                    |                                    |                                    |                                        |    |    |    |  |
|--------------------------------------------|--------------------|------------------------------------|------------------------------------|----------------------------------------|----|----|----|--|
| ATOM<br>NUMBER<br>(I)                      | CHEMICAL<br>SYMBOL | BOND LENGTH<br>(ANGSTROMS)<br>NA:I | BOND ANGLE<br>(DEGREES)<br>NB:NA:I | TWIST ANGLE<br>(DEGREES)<br>NC:NB:NA:I | NA | NB | NC |  |
| 1                                          | N                  | 0.00000                            | 0.00000                            | 0.00000                                | 0  | 0  | 0  |  |
| 2                                          | C                  | 1.33530                            | 0.00000                            | 0.00000                                | 1  | 0  | 0  |  |
| 3                                          | N                  | 1.34637                            | 124.12365                          | 0.00000                                | 2  | 1  | 0  |  |
| 4                                          | C                  | 1.33419                            | 115.83393                          | -.64148                                | 3  | 2  | 1  |  |
| 5                                          | N                  | 1.34687                            | 124.24445                          | .25003                                 | 4  | 3  | 2  |  |
| 6                                          | C                  | 1.33378                            | 115.74654                          | -.12629                                | 5  | 4  | 3  |  |
| 7                                          | N                  | 1.34113                            | 119.43177                          | 179.72759                              | 2  | 1  | 3  |  |
| 8                                          | N                  | 1.34068                            | 119.16913                          | -179.60765                             | 4  | 3  | 2  |  |
| 9                                          | N                  | 1.34118                            | 119.18687                          | -179.59077                             | 6  | 5  | 4  |  |
| 10                                         | C                  | 1.45451                            | 125.47871                          | 1.06498                                | 7  | 2  | 1  |  |
| 11                                         | C                  | 1.45438                            | 124.80054                          | -2.46968                               | 8  | 4  | 3  |  |
| 12                                         | C                  | 1.45437                            | 124.83383                          | -2.33046                               | 9  | 6  | 5  |  |
| 13                                         | H                  | 1.07815                            | 107.40611                          | 16.37156                               | 10 | 7  | 2  |  |
| 14                                         | H                  | 1.07942                            | 107.70929                          | 28.32969                               | 11 | 8  | 4  |  |
| 15                                         | H                  | 1.07937                            | 107.68056                          | 27.24338                               | 12 | 9  | 6  |  |
| 16                                         | H                  | 1.08315                            | 108.32345                          | 132.44314                              | 10 | 7  | 2  |  |
| 17                                         | H                  | 1.08482                            | 110.44453                          | -88.11877                              | 11 | 8  | 4  |  |
| 18                                         | H                  | 1.08487                            | 110.43686                          | -89.20304                              | 12 | 9  | 6  |  |
| 19                                         | C                  | 1.51546                            | 113.36302                          | -105.82660                             | 10 | 7  | 2  |  |
| 20                                         | C                  | 1.51316                            | 111.20716                          | 149.93793                              | 11 | 8  | 4  |  |
| 21                                         | C                  | 1.51326                            | 111.24715                          | 148.86265                              | 12 | 9  | 6  |  |
| 22                                         | C                  | 1.39517                            | 120.35659                          | 66.00115                               | 19 | 10 | 7  |  |
| 23                                         | C                  | 1.38960                            | 120.70741                          | 124.74316                              | 20 | 11 | 8  |  |
| 24                                         | C                  | 1.38960                            | 120.70301                          | 125.00620                              | 21 | 12 | 9  |  |
| 25                                         | C                  | 1.38905                            | 120.86700                          | -114.14460                             | 19 | 10 | 7  |  |
| 26                                         | C                  | 1.39476                            | 120.54831                          | -56.35133                              | 20 | 11 | 8  |  |
| 27                                         | C                  | 1.39474                            | 120.55244                          | -56.10051                              | 21 | 12 | 9  |  |
| 28                                         | C                  | 1.38420                            | 120.87931                          | -179.99496                             | 22 | 19 | 10 |  |
| 29                                         | C                  | 1.38932                            | 121.08250                          | 178.72486                              | 23 | 20 | 11 |  |
| 30                                         | C                  | 1.38932                            | 121.08400                          | 178.71226                              | 24 | 21 | 12 |  |
| 31                                         | C                  | 1.39002                            | 121.11478                          | -179.92543                             | 25 | 19 | 10 |  |
| 32                                         | C                  | 1.38465                            | 120.96031                          | -178.87044                             | 26 | 20 | 11 |  |
| 33                                         | C                  | 1.38464                            | 120.95863                          | -178.85630                             | 27 | 21 | 12 |  |
| 34                                         | C                  | 1.37369                            | 118.19718                          | -.06827                                | 31 | 25 | 19 |  |
| 35                                         | C                  | 1.37424                            | 118.26246                          | .19164                                 | 29 | 23 | 20 |  |
| 36                                         | C                  | 1.37424                            | 118.26154                          | .19155                                 | 30 | 24 | 21 |  |
| 37                                         | H                  | 1.07258                            | 119.39068                          | .29120                                 | 22 | 19 | 10 |  |
| 38                                         | H                  | 1.07322                            | 119.75015                          | -1.37167                               | 23 | 20 | 11 |  |
| 39                                         | H                  | 1.07323                            | 119.75363                          | -1.38143                               | 24 | 21 | 12 |  |
| 40                                         | H                  | 1.07369                            | 119.80782                          | .00000                                 | 25 | 19 | 10 |  |
| 41                                         | H                  | 1.07272                            | 119.52099                          | 1.26408                                | 26 | 20 | 11 |  |
| 42                                         | H                  | 1.07271                            | 119.52470                          | 1.27875                                | 27 | 21 | 12 |  |
| 43                                         | H                  | 1.07084                            | 121.75361                          | -179.90176                             | 28 | 22 | 19 |  |
| 44                                         | H                  | 1.07068                            | 121.71836                          | 179.94992                              | 29 | 23 | 20 |  |
| 45                                         | H                  | 1.07067                            | 121.71919                          | 179.94751                              | 30 | 24 | 21 |  |
| 46                                         | H                  | 1.07075                            | 121.76159                          | -179.97943                             | 31 | 25 | 19 |  |
| 47                                         | H                  | 1.07076                            | 121.76063                          | 179.93710                              | 32 | 26 | 20 |  |
| 48                                         | H                  | 1.07076                            | 121.75928                          | 179.93356                              | 33 | 27 | 21 |  |
| 49                                         | F                  | 1.37581                            | 118.80170                          | -179.94033                             | 34 | 31 | 25 |  |
| 50                                         | F                  | 1.37501                            | 118.80556                          | 179.83352                              | 35 | 29 | 23 |  |
| 51                                         | F                  | 1.37498                            | 118.80712                          | 179.82738                              | 36 | 30 | 24 |  |
| 52                                         | H                  | .99273                             | 115.41433                          | -177.18602                             | 7  | 2  | 1  |  |
| 53                                         | H                  | .99281                             | 115.88074                          | -177.18682                             | 8  | 4  | 3  |  |
| 54                                         | H                  | .99278                             | 115.91971                          | -177.65666                             | 9  | 6  | 5  |  |



Plots of  $I_{2\omega}/I_{\omega}^2$  vs number density for Molecule 1-4 in chloroform at 1064nm. The solid lines represent the linear least squares fit through the experimental data. Inset: HRS spectra obtained by averaging 150 laser pulses in the range of 510–550 nm.

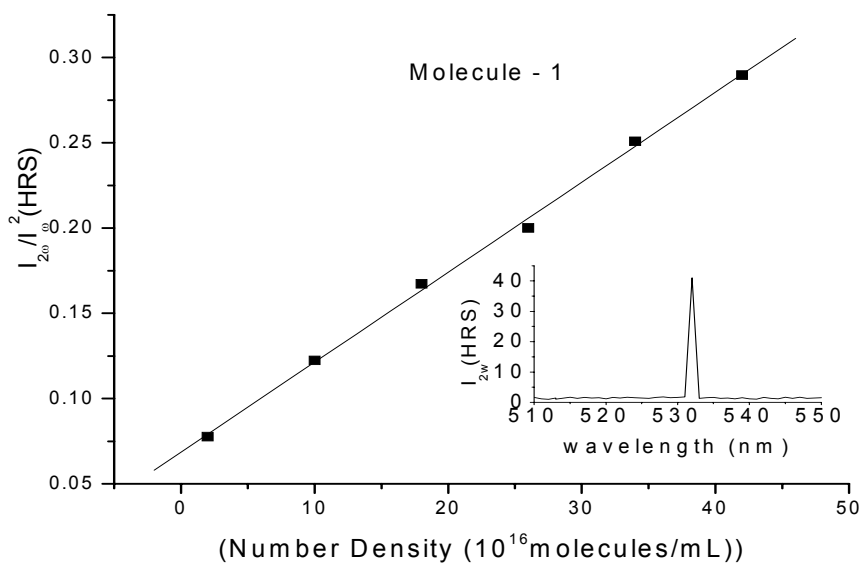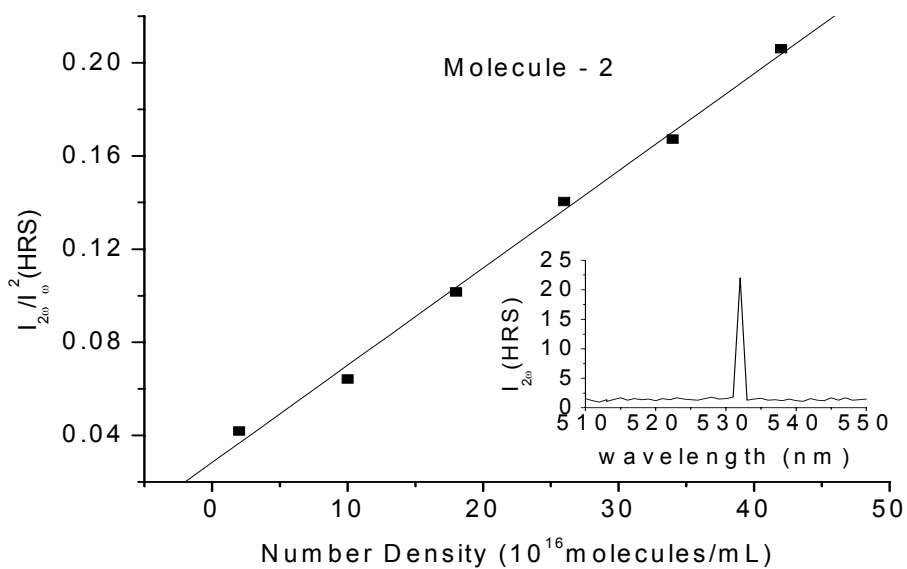

continued---

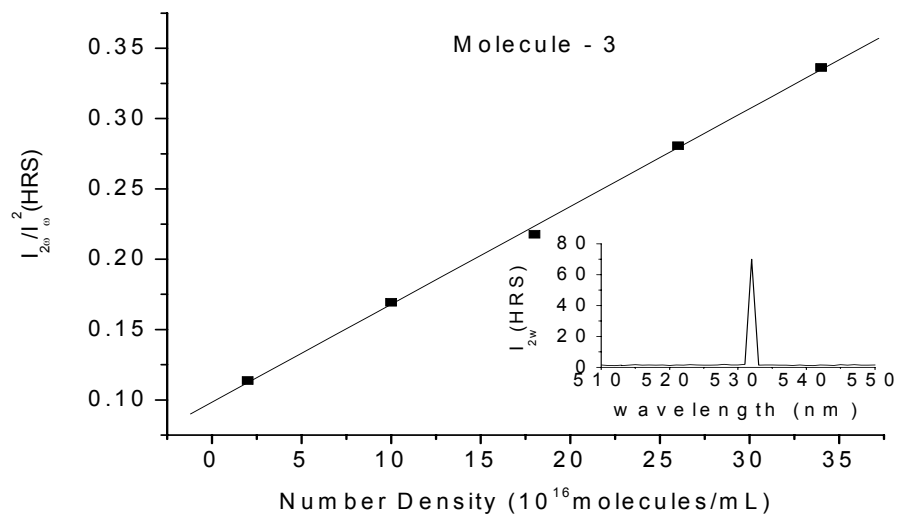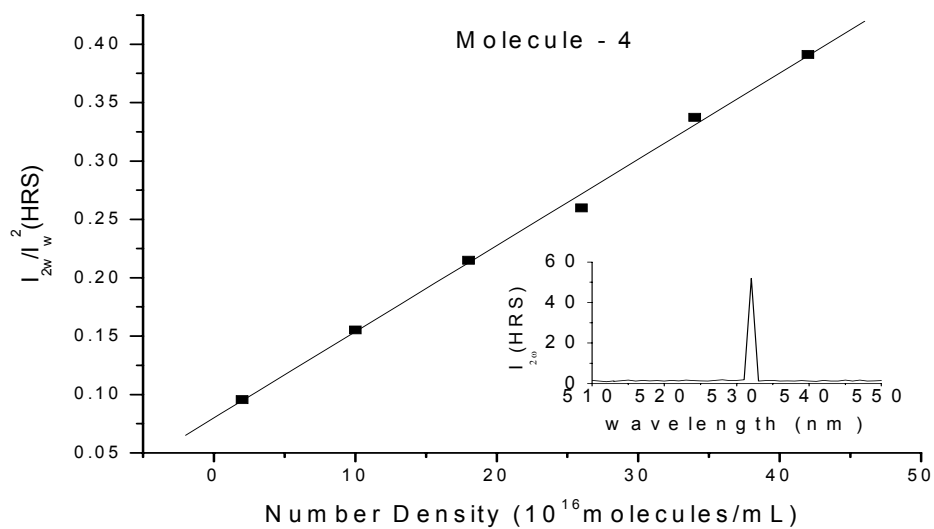

Supplement: b414311f.pdf [file b414311f.pdf]
